# Supplementary material for: Biomarkers of Inflammation and Risk of Hospitalization for Heart Failure in Patients With Atrial Fibrillation
Source: PubMed Central journal article supplement — J Am Heart Assoc. 2021 Apr 10;10(8):e019168. doi: 10.1161/JAHA.120.019168 (PMC8174180; doi:10.1161/jaha.120.019168), 2021-04-10

# **SUPPLEMENTAL MATERIAL**

## Appendix

### Swiss-AF investigators

University Hospital Basel and Basel University: Stefanie Aeschbacher, Chloé Auberson, Steffen Blum, Leo Bonati, Selinda Ceylan, David Conen, Simone Doerpfeld, Ceylan Eken, Marc Girod, Elisa Hennings, Philipp Krisai, Michael Kühne, Christine Meyer-Zürn, Pascal Meyre, Andreas U. Monsch, Christian Müller, Stefan Osswald, Anne Springer, Christian Sticherling, Thomas Szucs, Gian Völlmin, Leon Zwimpfer.  
Principal Investigator: Stefan Osswald; Local Principal Investigator: Michael Kühne

University Hospital Bern: Faculty: Drahomir Aujesky, Urs Fischer, Juerg Fuhrer, Laurent Roten, Simon Jung, Heinrich Mattle; Research fellows: Luise Adam, Carole Elodie Aubert, Martin Feller, Axel Loewe, Elisavet Moutzouri, Claudio Schneider; Study nurses: Tanja Flückiger, Cindy Groen, Lukas Ehram, Sven Hellrigl, Alexandra Nuoffer, Damiana Rakovic, Nathalie Schwab, Rylana Wenger. Local Principal Investigator: Nicolas Rodondi

Stadtspital Triemli Zurich: Christopher Beynon, Roger Dillier, Michèle Deubelbeiss, Franz Eberli, Christine Franzini, Isabel Juchli, Claudia Liedtke, Jacqueline Nadler, Thayze Obst, Jasmin Roth, Fiona Schломowitsch, Xiaoye Schneider, Katrin Studerus, Noreen Tynan, Dominik Weishaupt. Local Principal Investigator: Andreas Müller

Kantonsspital Baden: Simone Fontana, Silke Kuest, Karin Scheuch, Denise Hischier, Nicole Bonetti, Alexandra Grau, Jonas Villinger, Eva Laube, Philipp Baumgartner, Mark Filipovic, Marcel Frick, Giulia Montrasio, Stefanie Leuenberger, Franziska Rutz. Local Principal Investigator: Jürg-Hans Beer

Cardiocentro Lugano: Angelo Auricchio, Adriana Anesini, Cristina Camporini, Giulio Conte, Maria Luce Caputo, Francois Regoli. Local Principal Investigator: Tiziano Moccetti

Kantonsspital St. Gallen: Roman Brenner, David Altmann, Michaela Gemperle. Local Principal Investigator: Peter Ammann

Hôpital Cantonal Fribourg: Mathieu Firmann, Sandrine Foucras, Martine Rime. Local Principal Investigator: Daniel Hayoz

Luzerner Kantonsspital: Benjamin Berte, Virginia Justi, Frauke Kellner-Weldon, Brigitta Mehmman, Sonja Meier, Myriam Roth, Andrea Ruckli-Kaeppeli, Ian Russi, Kai Schmidt, Mabelle Young, Melanie Zbinden. Local Principal Investigator: Richard Kobza

Ente Ospedaliero Cantonale Lugano: Jane Frangi-Kultalahti, Anica Pin, Luisa Vicari  
Local Principal Investigator: Giorgio Moschovitis

University Hospital Geneva: Georg Ehret, Hervé Gallet, Elise Guillermet, Francois Lazeyras, Karl-Olof Lovblad, Patrick Perret, Philippe Tavel, Cheryl Teres. Local Principal Investigator: Dipen Shah

University Hospital Lausanne: Nathalie Lauriers, Marie Méan, Sandrine Salzmman. Local Principal Investigator: Jürg Schläpfer

Bürgerspital Solothurn: Andrea Grêt, Jan Novak, Sandra Vitelli. Local Principal Investigator: Frank-Peter Stephan

Ente Ospedaliero Cantonale Bellinzona: Jane Frangi-Kultalahti, Augusto Gallino. Local Principal Investigator: Marcello Di Valentino

University of Zurich/University Hospital Zurich: Fabienne Witassek, Matthias Schwenkglenks.

Medical Image Analysis Center AG Basel: Jens Würfel (Head), Anna Altermatt, Michael Amann, Petra Huber, Esther Ruberte, Tim Sinnecker, Vanessa Zuber.

Clinical Trial Unit Basel: Michael Coslovsky (Head), Pascal Benkert, Gilles Dutilh, Milica Markovic, Pia Neuschwander, Patrick Simon

Schiller AG Baar: Ramun Schmid

**Table S1. Outcome definitions.**

|                                   |                                                                                                                                                                                                                                                                                                                                                                                                                                                                                                                                                                                                                                                                                                                                                               |
|-----------------------------------|---------------------------------------------------------------------------------------------------------------------------------------------------------------------------------------------------------------------------------------------------------------------------------------------------------------------------------------------------------------------------------------------------------------------------------------------------------------------------------------------------------------------------------------------------------------------------------------------------------------------------------------------------------------------------------------------------------------------------------------------------------------|
| Hospitalization for heart failure | <p>Hospitalization for acute heart failure is defined as: any hospitalization for acute heart failure that is associated with at least one overnight stay. If it's not clear whether the reason for a patient's hospitalization is acute heart failure or not, this event/incidence should in doubt be classified as acute heart failure. The following references mentioned under clinical examination, or in the progress entry could be used as an indication for heart failure: leg swelling/leg edema, distension of the neck veins, positive hepato-jugular reflux, rales and 3rd heart sound</p>                                                                                                                                                       |
| Mortality                         | <p>Deaths will be classified as either cardiovascular or non-cardiovascular. All deaths will be assumed to be cardiovascular in nature unless a non-cardiovascular cause can be clearly provided. Cardiovascular death: includes cardiac deaths (e.g. cardiogenic shock, arrhythmia/sudden death, cardiac rupture) and other vascular deaths (e.g., stroke, pulmonary embolism, ruptured aortic aneurysm or dissection). All hemorrhagic deaths will be classified as cardiovascular deaths. Non-cardiovascular death: includes all deaths due to a clearly documented non-cardiac and non-vascular cause, such as respiratory failure (excluding cardiogenic pulmonary edema), infections/sepsis, neoplasm, and trauma (including suicide and homicide).</p> |

|                       |                                                                                                                                                                                                                                                                                                                                                                                                                                                                                                                                                                                                                                                                                                                            |
|-----------------------|----------------------------------------------------------------------------------------------------------------------------------------------------------------------------------------------------------------------------------------------------------------------------------------------------------------------------------------------------------------------------------------------------------------------------------------------------------------------------------------------------------------------------------------------------------------------------------------------------------------------------------------------------------------------------------------------------------------------------|
| Ischemic stroke       | <p>Defined as a rapid onset of focal neurological dysfunction with clinical, imaging or pathological evidence of focal infarction of the brain, retina (excluding anterior ischaemic optic neuropathy [AION]), or spinal cord explaining the dysfunction. Clinical evidence of infarction is based on symptoms persisting <math>\geq 24</math> hours or until death, and exclusion of other aetiologies (such as brain infection, trauma, tumour, seizure, severe metabolic disease, or degenerative neurological disease). Transient neurological symptoms associated with cerebral infarction on imaging should be classified as ischaemic stroke, not TIA.</p>                                                          |
| Systemic embolism     | <p>A systemic arterial embolism will be considered to have occurred where there is clear evidence of abrupt occlusion of a systemic artery consistent with an embolic event. Pulmonary embolism or deep vein thrombosis should not be reported.</p>                                                                                                                                                                                                                                                                                                                                                                                                                                                                        |
| Myocardial infarction | <p>Myocardial infarction is defined according to the universal definition of MI as rise and/or fall of cardiac troponin with at least one value above the 99th percentile of the upper reference limit in a clinical setting consistent with myocardial ischemia, and with at least one of the following:</p> <ul style="list-style-type: none"> <li>- symptoms of ischemia</li> <li>- new ST elevation at the J point in two contiguous leads <math>&gt; 0.1</math> mV except for V2-V3. For leads V2-V3 the following cut points apply: <math>\geq 0.2</math> mV in men <math>\geq 40</math> years, <math>\geq 0.25</math> mV in men <math>&lt; 40</math> years and <math>\geq 0.15</math> mV in women on ECG</li> </ul> |

- |  |                                                                                                                                                                                                                                                                                                                                                                                                                                                                                                                                                        |
|--|--------------------------------------------------------------------------------------------------------------------------------------------------------------------------------------------------------------------------------------------------------------------------------------------------------------------------------------------------------------------------------------------------------------------------------------------------------------------------------------------------------------------------------------------------------|
|  | <ul style="list-style-type: none"><li>- new horizontal or down-sloping ST depression <math>\geq 0.05</math> mV in two contiguous leads and/or T inversion <math>\geq 0.1</math> mV in two contiguous leads with prominent R wave or R/S ratio <math>&gt; 1</math></li><li>- new left bundle branch block on ECG</li><li>- development of pathological Q waves on ECG</li><li>- imaging evidence of new loss of viable myocardium or new regional wall motion</li><li>- identification of an intracoronary thrombus by angiography or autopsy</li></ul> |
|--|--------------------------------------------------------------------------------------------------------------------------------------------------------------------------------------------------------------------------------------------------------------------------------------------------------------------------------------------------------------------------------------------------------------------------------------------------------------------------------------------------------------------------------------------------------|

**Table S2. Association of the inflammation score with adverse outcome events (sensitivity and competing risk analyses).**

|                                   |                    | Sensitivity analysis |                   |                         |                   | Primary analysis     |                   |
|-----------------------------------|--------------------|----------------------|-------------------|-------------------------|-------------------|----------------------|-------------------|
|                                   |                    |                      |                   | Competing risk analysis |                   |                      |                   |
| Outcome                           | Inflammation score | Adjusted HR (95% CI) | p-value for trend | Adjusted HR (95% CI)    | p-value for trend | Adjusted HR (95% CI) | p-value for trend |
| Hospitalization for heart failure | 0                  | Reference category   |                   | Reference category      |                   | Reference category   |                   |
|                                   | 1                  | 1.27 (0.92-1.76)     | <0.001            | 1.24 (0.90-1.71)        | <0.001            | 1.32 (0.96-1.82)     | <0.001            |
|                                   | 2                  | 1.38 (0.99-1.91)     |                   | 1.31 (0.94-1.83)        |                   | 1.45 (1.04-2.00)     |                   |
|                                   | 3                  | 1.95 (1.41-2.70)     |                   | 1.78 (1.28-2.47)        |                   | 2.04 (1.48-2.83)     |                   |
|                                   | 4                  | 2.29 (1.68-3.11)     |                   | 2.08 (1.51-2.85)        |                   | 2.43 (1.80-3.30)     |                   |
| All-cause mortality               | 0                  | Reference category   |                   |                         |                   | Reference category   |                   |
|                                   | 1                  | 2.17 (1.48-3.17)     | <0.001            |                         |                   | 2.20 (1.50-3.21)     | <0.001            |
|                                   | 2                  | 2.76 (1.89-4.02)     |                   | 2.85 (1.95-4.15)        |                   |                      |                   |
|                                   | 3                  | 3.74 (2.57-5.45)     |                   | 3.85 (2.64-5.60)        |                   |                      |                   |
|                                   | 4                  | 4.79 (3.34-6.87)     |                   | 4.96 (3.47-7.09)        |                   |                      |                   |
|                                   | 0                  | Reference category   |                   | Reference category      |                   | Reference category   |                   |

|                                                                |   |                    |        |                    |        |                    |        |
|----------------------------------------------------------------|---|--------------------|--------|--------------------|--------|--------------------|--------|
| Cardiovascular death                                           | 1 | 2.32 (1.46-3.70)   | <0.001 | 2.36 (1.47-3.77)   | <0.001 | 2.36 (1.49-3.76)   | <0.001 |
|                                                                | 2 | 2.16 (1.33-3.51)   |        | 2.10 (1.26-3.50)   |        | 2.24 (1.38-3.63)   |        |
|                                                                | 3 | 3.49 (2.18-5.56)   |        | 3.40 (2.09-5.52)   |        | 3.61 (2.26-5.77)   |        |
|                                                                | 4 | 4.10 (2.62-6.42)   |        | 3.93 (2.46-6.28)   |        | 4.26 (2.72-6.65)   |        |
| Ischemic stroke, myocardial infarction or cardiovascular death | 0 | Reference category |        | Reference category |        | Reference category |        |
|                                                                | 1 | 1.74 (1.27-2.37)   | <0.001 | 1.72 (1.26-2.34)   | <0.001 | 1.80 (1.32-2.45)   | <0.001 |
|                                                                | 2 | 1.50 (1.07-2.11)   |        | 1.46 (1.03-2.06)   |        | 1.55 (1.11-2.17)   |        |
|                                                                | 3 | 2.58 (1.87-3.56)   |        | 2.49 (1.79-3.45)   |        | 2.65 (1.92-3.65)   |        |
|                                                                | 4 | 2.74 (2.00-3.75)   |        | 2.60 (1.90-3.57)   |        | 2.86 (2.10-3.90)   |        |
| Ischemic stroke or systemic embolism                           | 0 | Reference category |        | Reference category |        | Reference category |        |
|                                                                | 1 | 1.18 (0.71-1.98)   | 0.054  | 1.17 (0.70-1.97)   | 0.161  | 1.23 (0.74-2.06)   | 0.03   |
|                                                                | 2 | 0.77 (0.41-1.46)   |        | 0.75 (0.38-1.45)   |        | 0.81 (0.43-1.53)   |        |
|                                                                | 3 | 1.77 (1.01-3.09)   |        | 1.59 (0.89-2.85)   |        | 1.84 (1.05-3.20)   |        |
|                                                                | 4 | 1.60 (0.90-2.83)   |        | 1.45 (0.81-2.63)   |        | 1.76 (1.00-3.07)   |        |

All analyses were adjusted for age, sex, history of heart failure, hypertension, diabetes, prior stroke or transient ischemic attack, history of coronary artery disease, estimated glomerular filtration rate (eGFR) as per MDRD formula, body mass index, smoking status, anticoagulation use and study cohort (BEAT-AF or Swiss-AF). Sensitivity analyses were additionally adjusted for statin use



and cardiac rhythm at baseline. The competing risk analyses additionally accounted for death (first hospitalization for heart failure; composite of ischemic stroke or systemic embolism) and non-cardiovascular death (cardiovascular death; composite of ischemic stroke, myocardial infarction or cardiovascular death), respectively. Observations in model for the sensitivity analyses: 3,624 (95.8% complete cases due to missing information on plasma levels of hs-CRP or IL-6, or missing cardiac rhythm at baseline). Observations in primary model: 3,650 (96.5% complete cases due to missing information on plasma levels of hs-CRP or IL-6). HR hazard ratio, CI confidence interval.

**Figure S1. Cumulative incidence of all-cause mortality across inflammation score categories (Kaplan-Meier method).**

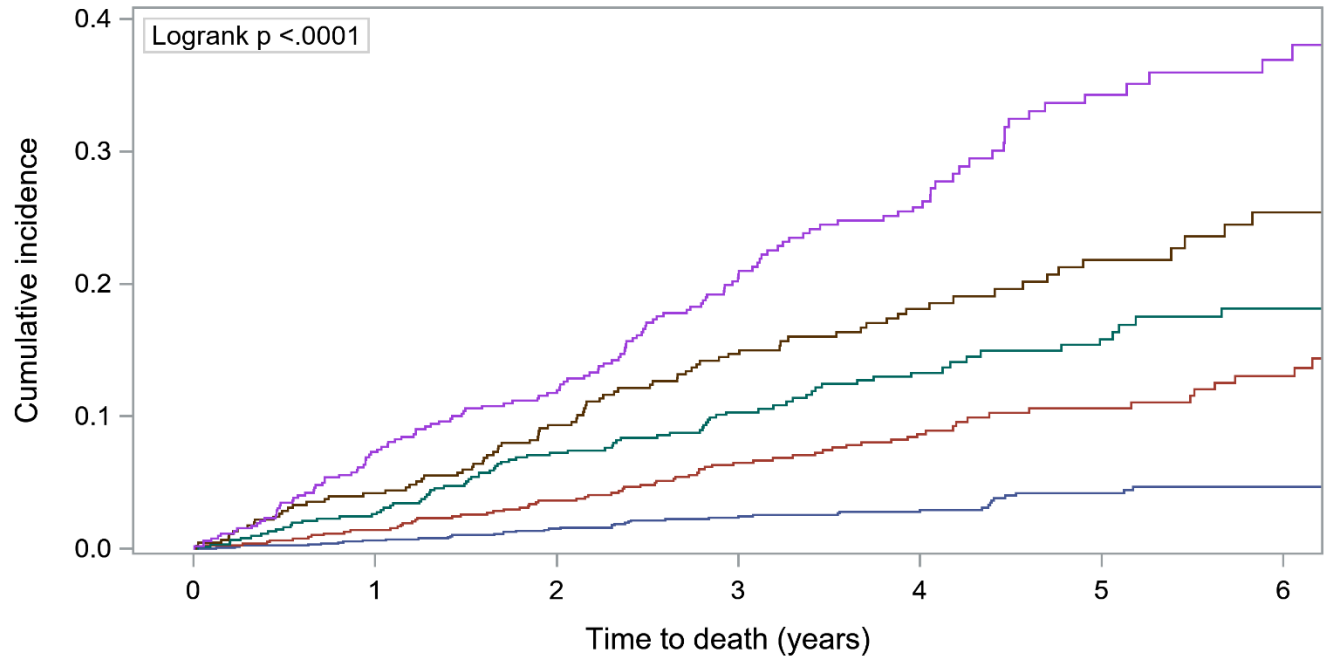

| Inflammation score | 0    | 1    | 2    | 3   | 4   |
|--------------------|------|------|------|-----|-----|
| 0                  | 1280 | 1268 | 1157 | 966 | 724 |
| 1                  | 779  | 764  | 695  | 582 | 396 |
| 2                  | 616  | 596  | 532  | 413 | 272 |
| 3                  | 454  | 435  | 383  | 306 | 206 |
| 4                  | 521  | 482  | 424  | 304 | 197 |

**Figure S2. Cumulative incidence of cardiovascular death across inflammation score categories (Kaplan-Meier method).**

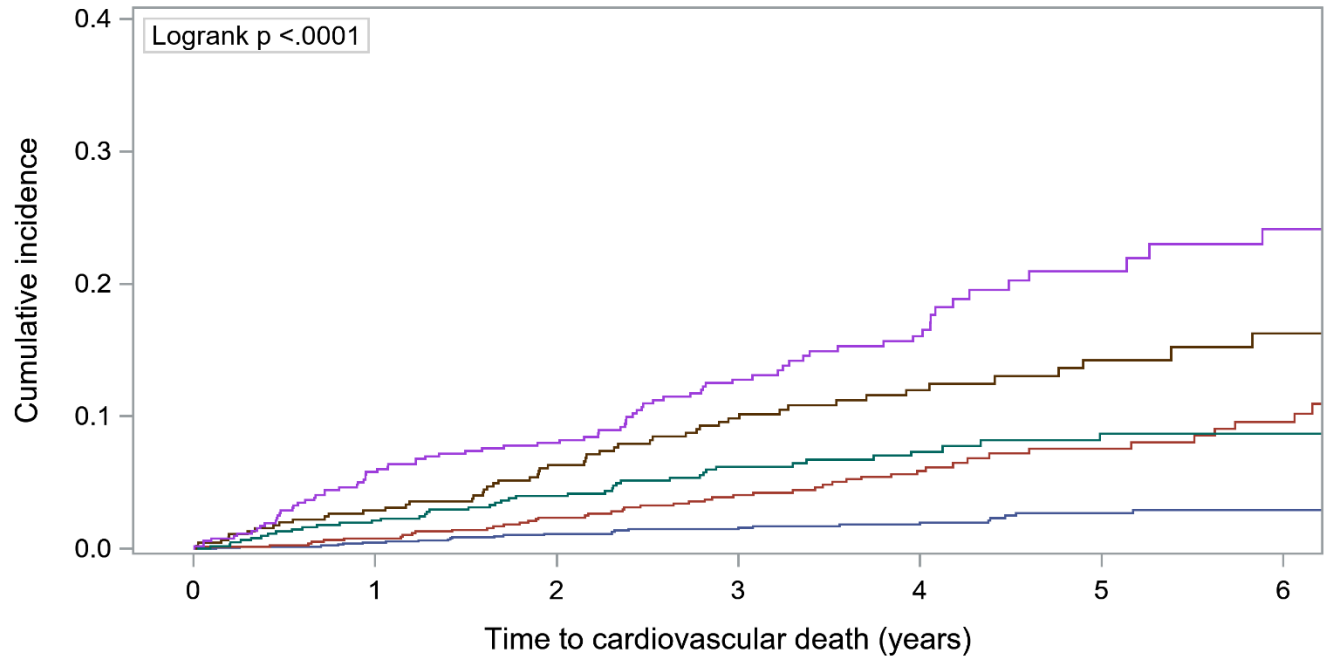

Inflammation score — 0 — 1 — 2 — 3 — 4

|   |      |      |      |     |     |     |     |
|---|------|------|------|-----|-----|-----|-----|
| 0 | 1280 | 1268 | 1157 | 966 | 724 | 500 | 362 |
| 1 | 779  | 764  | 695  | 582 | 396 | 243 | 164 |
| 2 | 616  | 596  | 532  | 413 | 272 | 186 | 118 |
| 3 | 454  | 435  | 383  | 306 | 206 | 133 | 76  |
| 4 | 521  | 482  | 424  | 304 | 197 | 100 | 64  |

**Figure S3. Cumulative incidence of ischemic stroke, myocardial infarction or cardiovascular death across inflammation score categories (Kaplan-Meier method).**

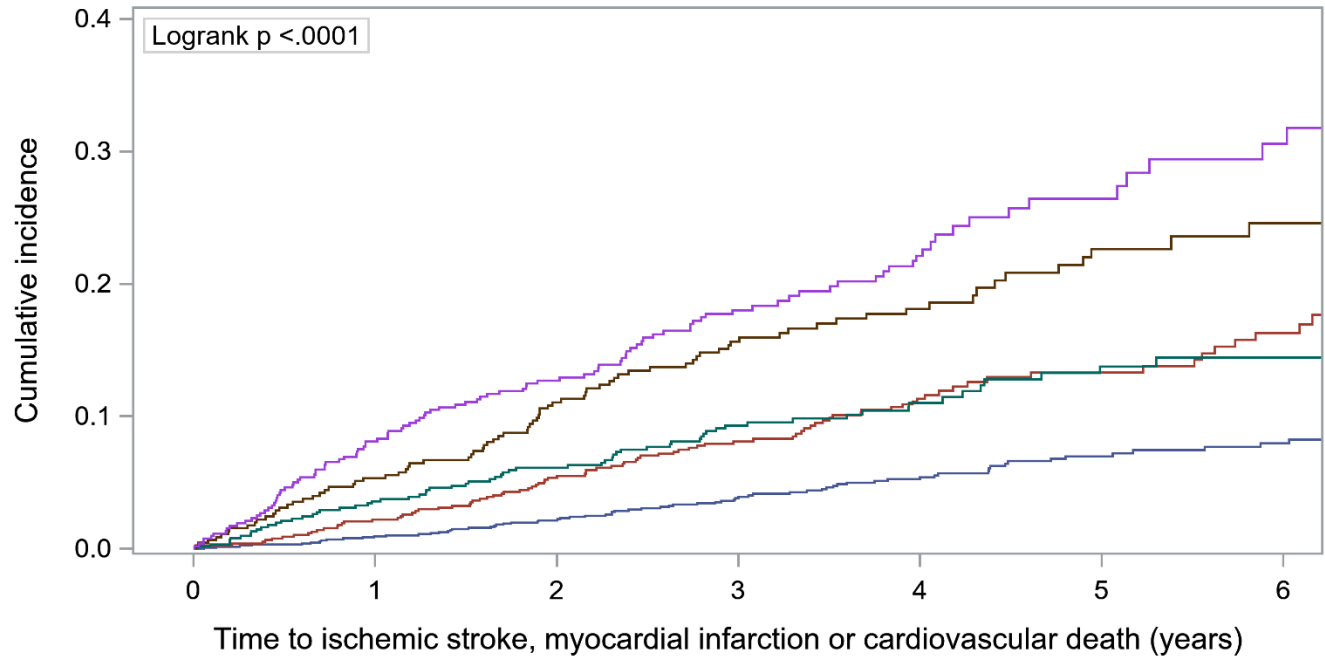

|   |      |      |      |     |     |     |     |
|---|------|------|------|-----|-----|-----|-----|
| 0 | 1280 | 1261 | 1144 | 943 | 701 | 481 | 350 |
| 1 | 779  | 753  | 674  | 562 | 376 | 233 | 156 |
| 2 | 616  | 587  | 522  | 400 | 263 | 177 | 109 |
| 3 | 454  | 424  | 366  | 288 | 193 | 123 | 71  |
| 4 | 521  | 470  | 402  | 283 | 179 | 94  | 60  |

**Figure S4. Cumulative incidence of ischemic stroke or systemic embolism across inflammation score categories (Kaplan-Meier method).**

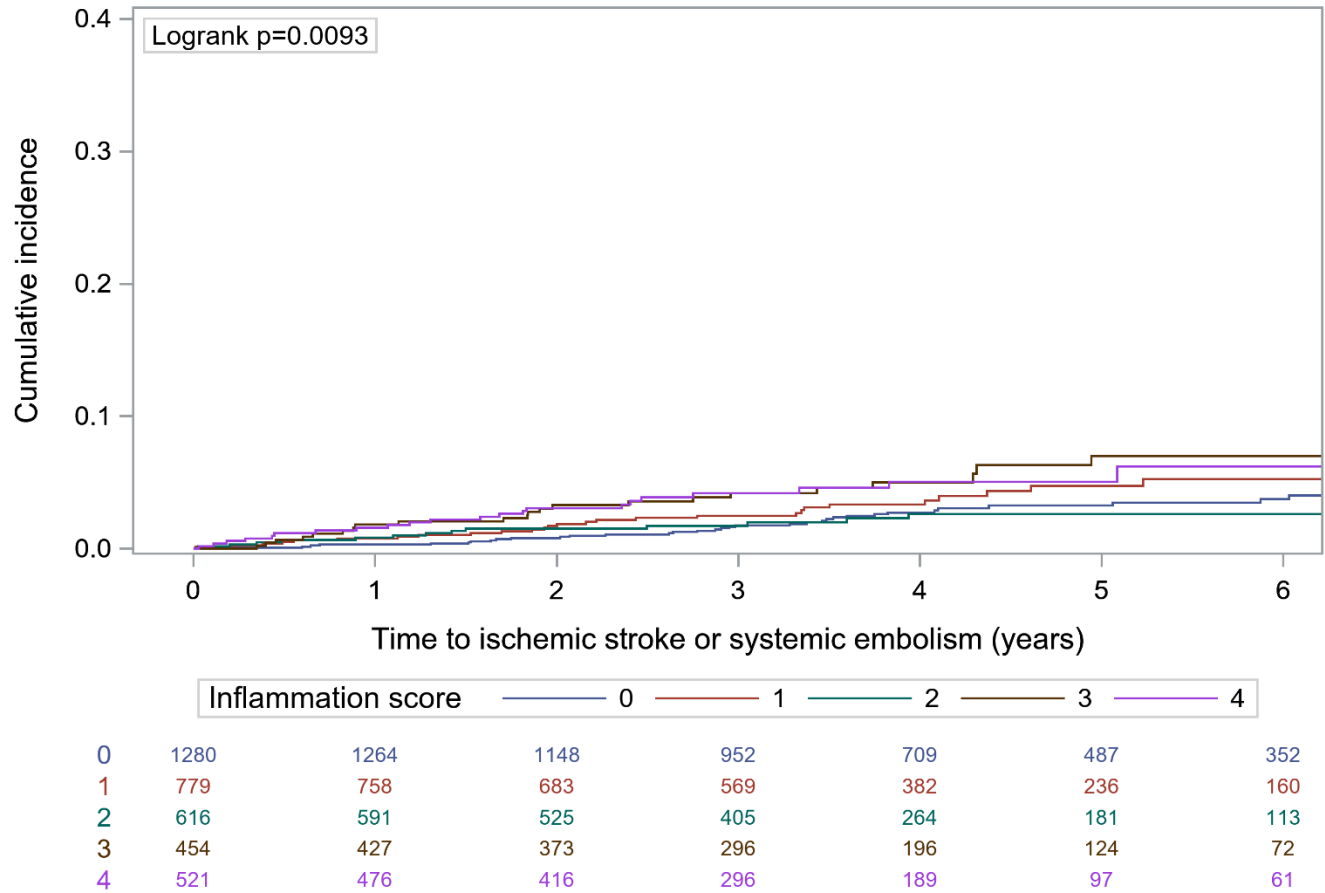

**Figure S5. Cumulative incidence function of heart failure hospitalization across inflammation score categories, accounting for the competing risk of death.**

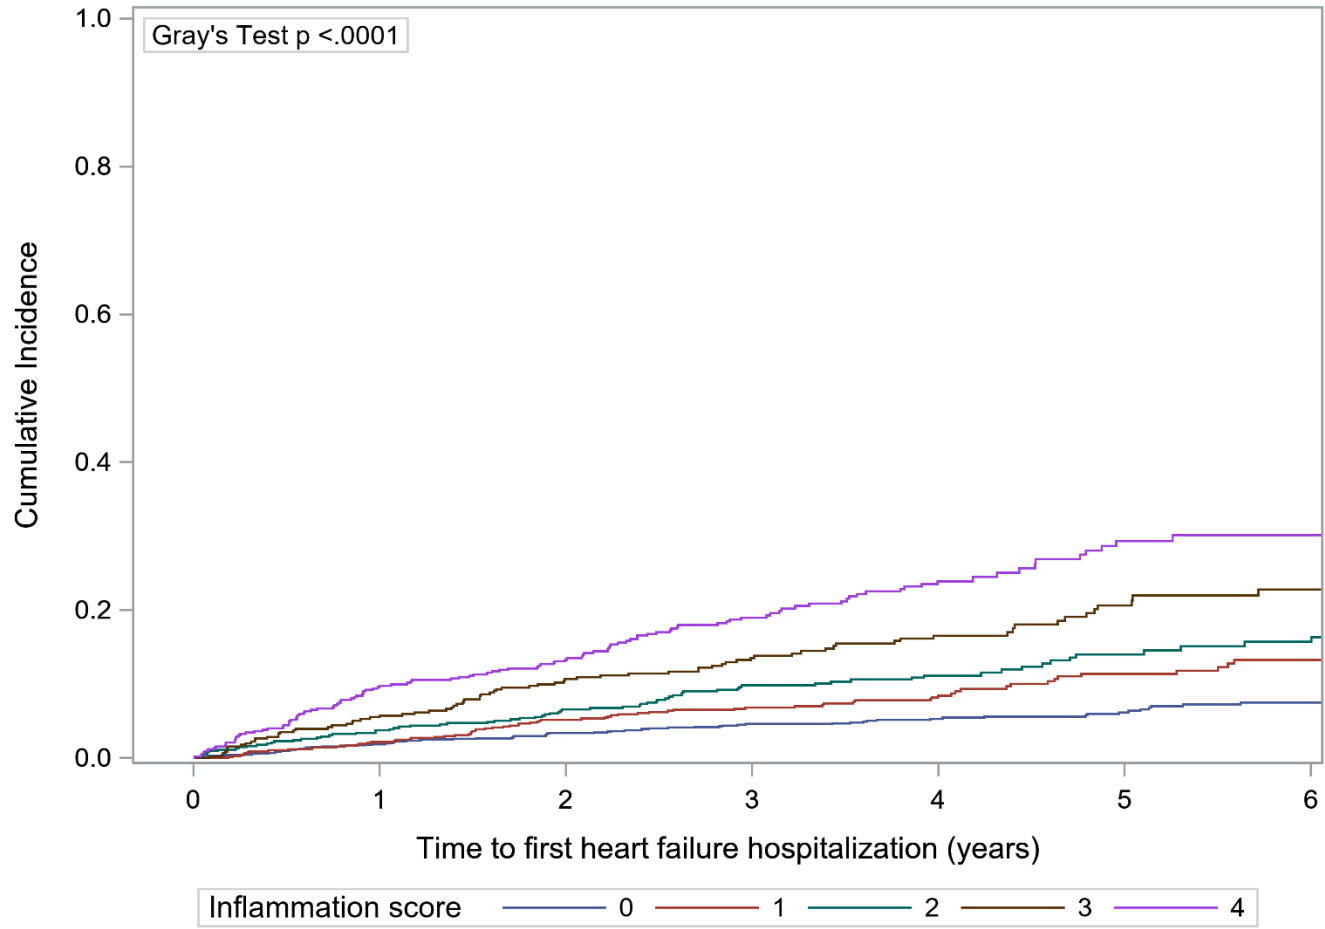

**Figure S6. Cumulative incidence function of cardiovascular death across inflammation score categories, accounting for the competing risk of non-cardiovascular death.**

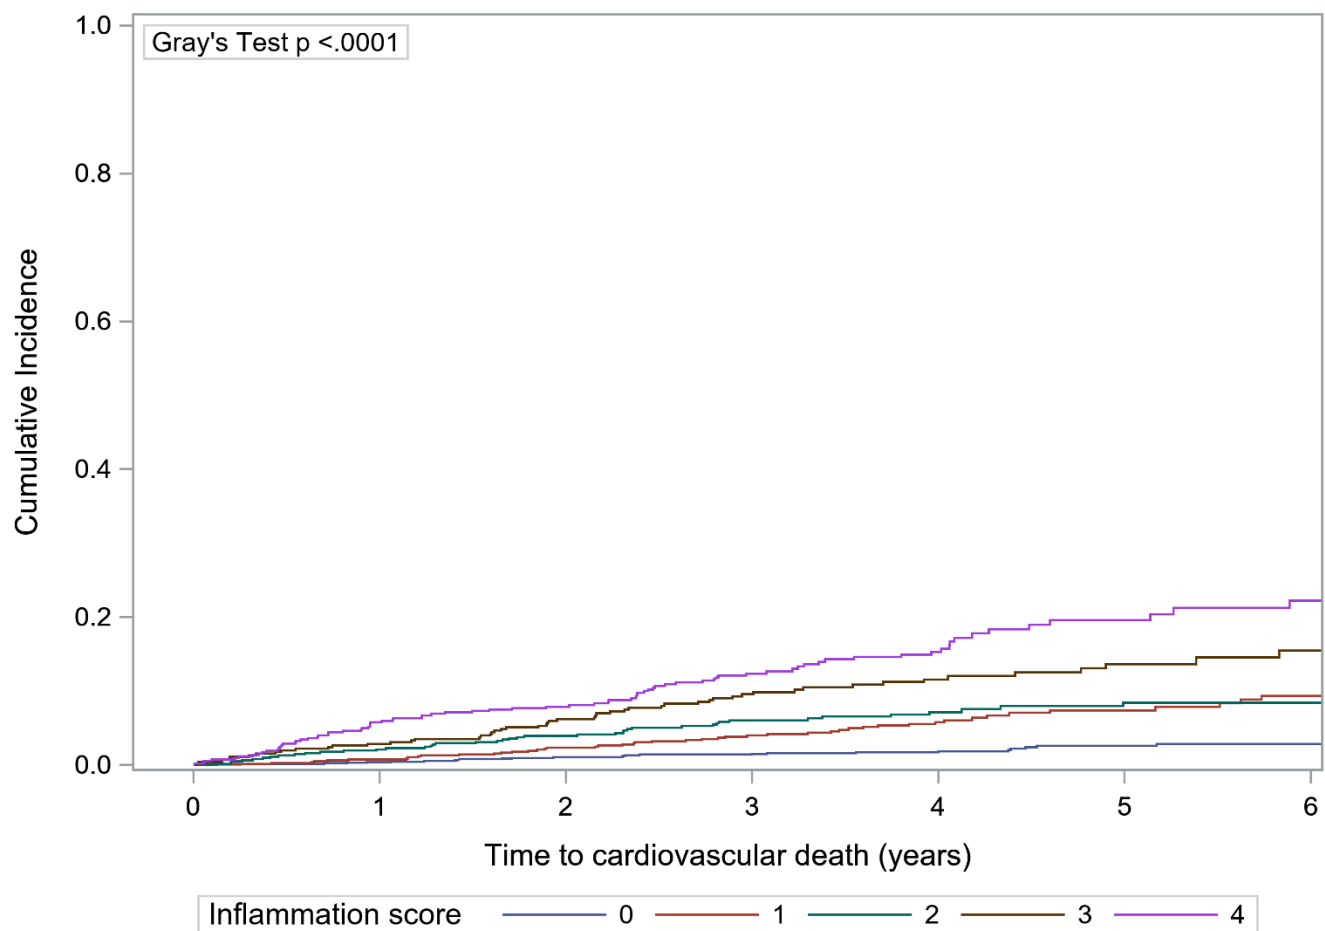

**Figure S7. Cumulative incidence function of ischemic stroke, myocardial infarction or cardiovascular death across categories of the inflammation score, accounting for the competing risk of non-cardiovascular death.**

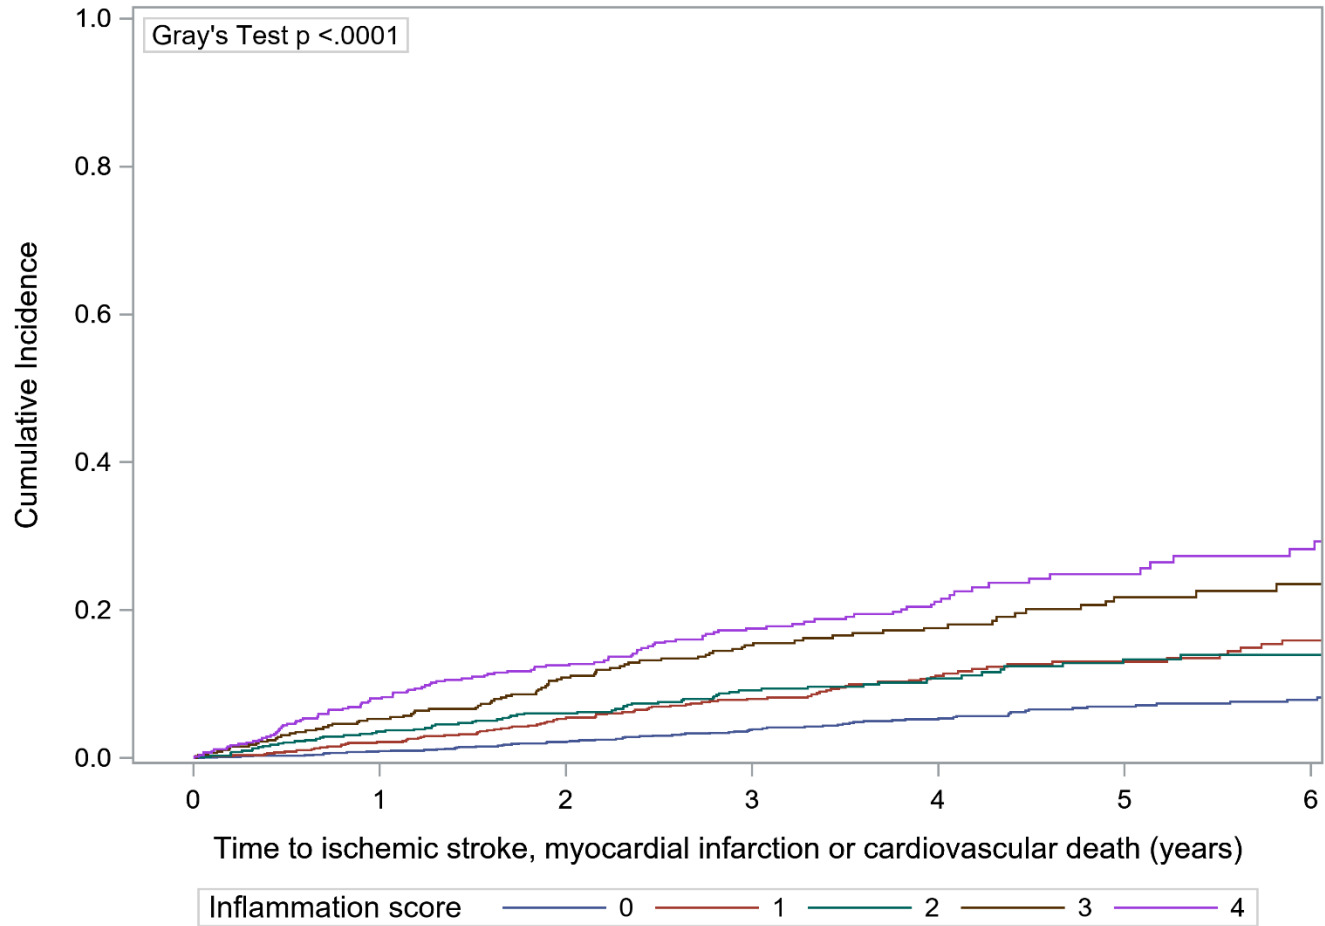



**Figure S8. Cumulative incidence function of ischemic stroke or systemic embolism across categories of the inflammation score, accounting for the competing risk of death.**

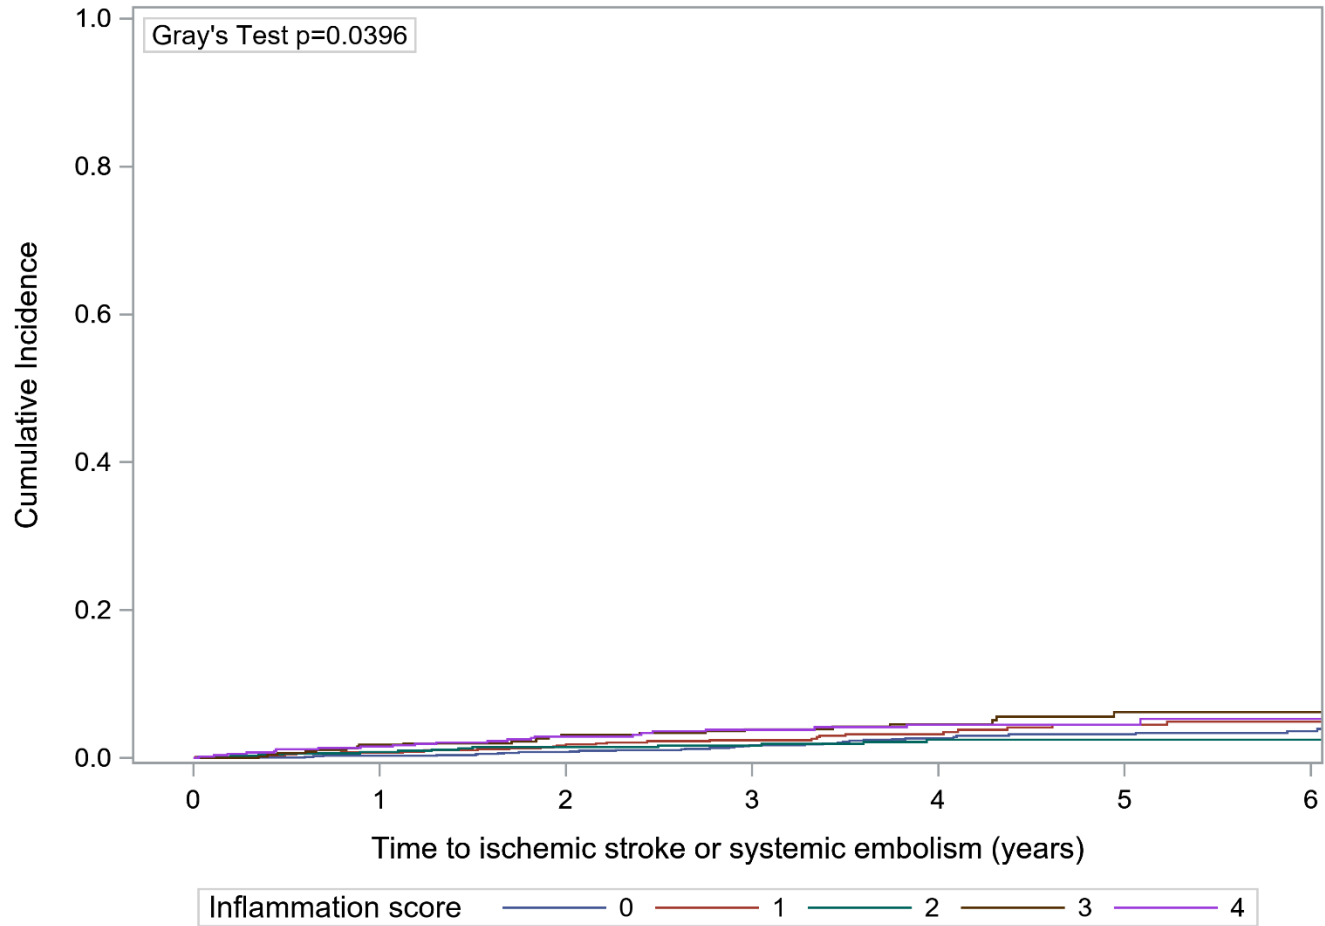

Supplement: JAH3-10-e019168-s001.pdf [file JAH3-10-e019168-s001.pdf]
